# Supplementary material for: Engineered macrophage-assisted atorvastatin nanotherapy for reversing foam cell formation in atherosclerosis
Source: Royal Society of Chemistry journal article supplement (doi:10.1039/d5tb01096a), 2026-01-01
Supplement: d5tb01096a1.pdf [file d5tb01096a1.pdf]

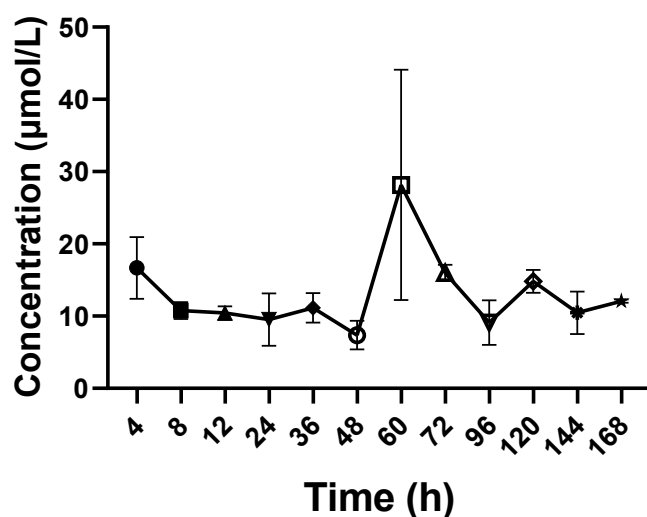

Figure S1 The release of atorvastatin (ATV) from cells over a 168-hour period.

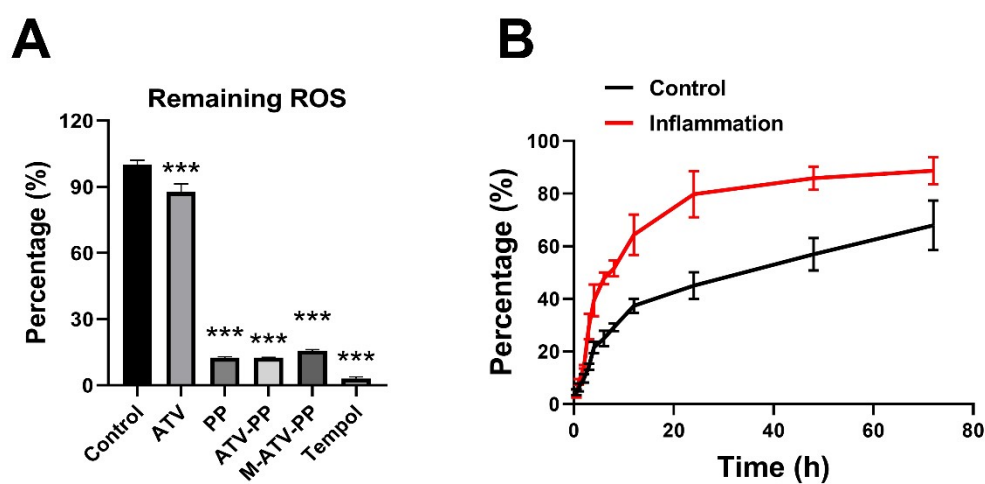

Figure S2 Experimental study on the clearance of physiological ROS by materials. (A) The clearance of ROS in the supernatant of cellular inflammation by several materials. (B) Release curves of normal culture and inflammatory culture. Data are presented as mean  $\pm$  SD. \*\*\* $P < 0.001$  vs. Control group. (n = 3 independent experiments)

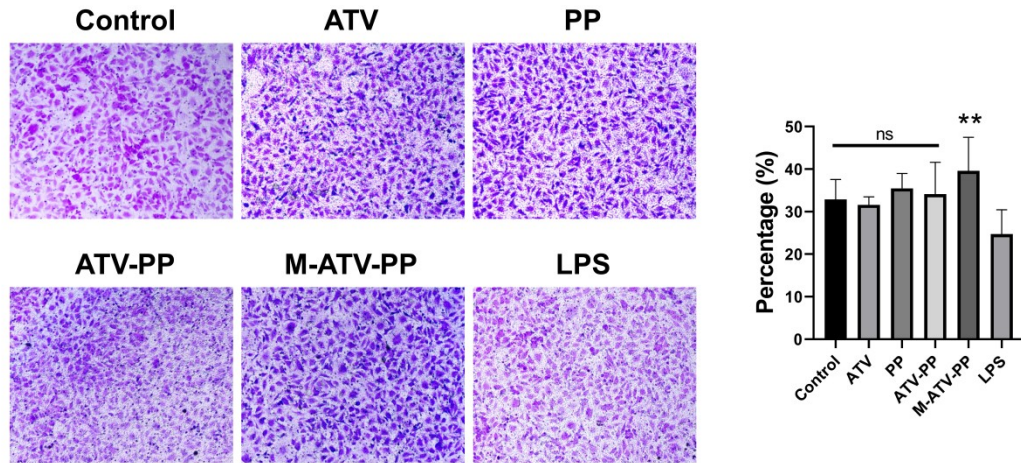

Figure S3. Treg cell migration crystal violet staining images and cell migrations quantification.

Data are presented as mean  $\pm$  SD. \*\* $P$  < 0.01 vs. Control group. ns indicating no significant

difference. (n = 3 independent experiments)

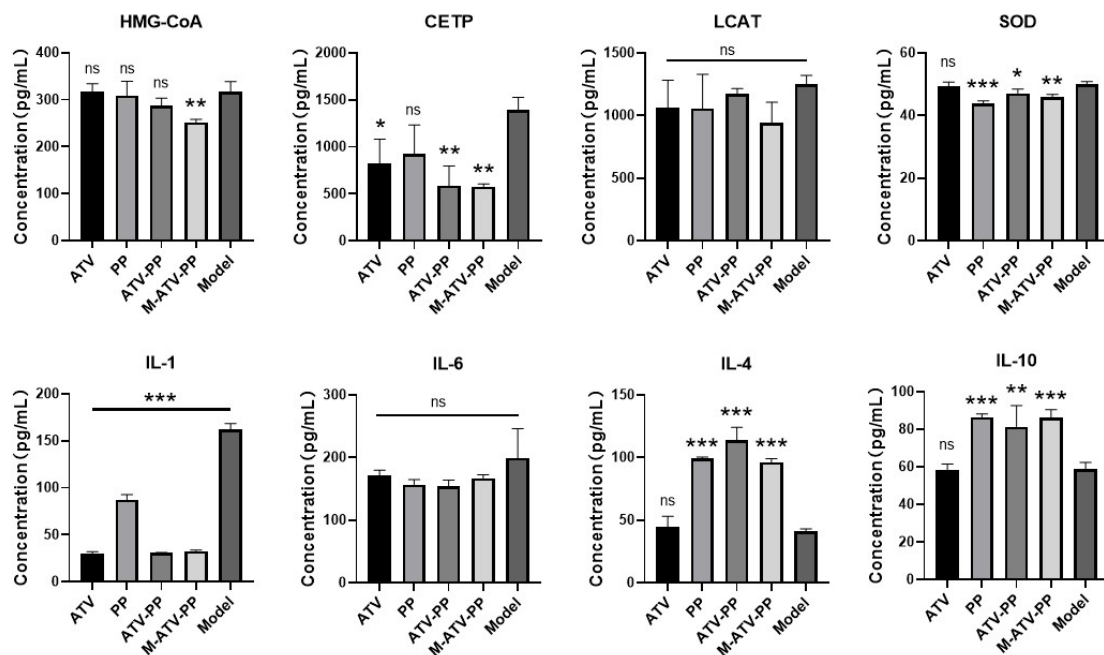

Figure S4. Levels blood lipid, enzyme and cytokine levels in atherosclerosis treatment. \* $P < 0.05$ ;

\*\* $P < 0.01$ ; \*\*\* $P < 0.001$  vs Model; ns indicating no significant difference. (n = 3-4

independent experiments)

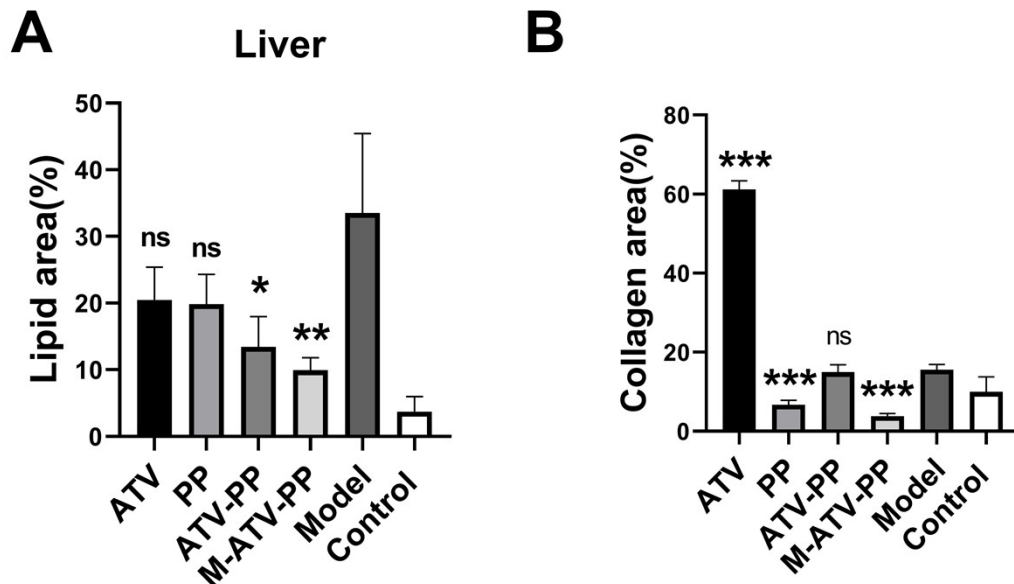

Figure S5. Quantitative results of partial sections of atherosclerosis mice. (A) Quantitative results

of Oil Red O staining on liver slices. (B) Quantitative results of Masson staining collagen in the

aortic root. \* $P < 0.05$ ; \*\* $P < 0.01$ ; \*\*\* $P < 0.001$  vs Model group; ns indicating no significant

difference. (n = 3 independent experiments)

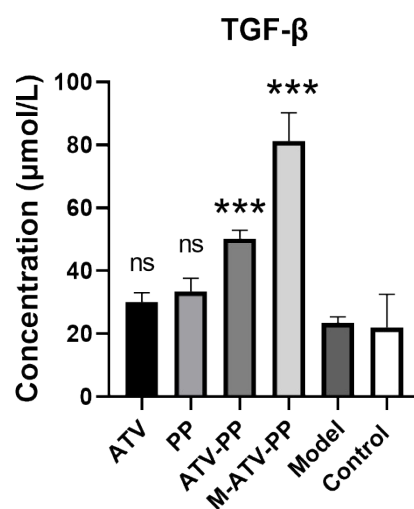

Figure S6. Expression of TGF in serum of atherosclerotic mice. \*\*\* $P < 0.001$  vs Model group; ns indicates no significant difference vs Model group. (n = 3 independent experiments)

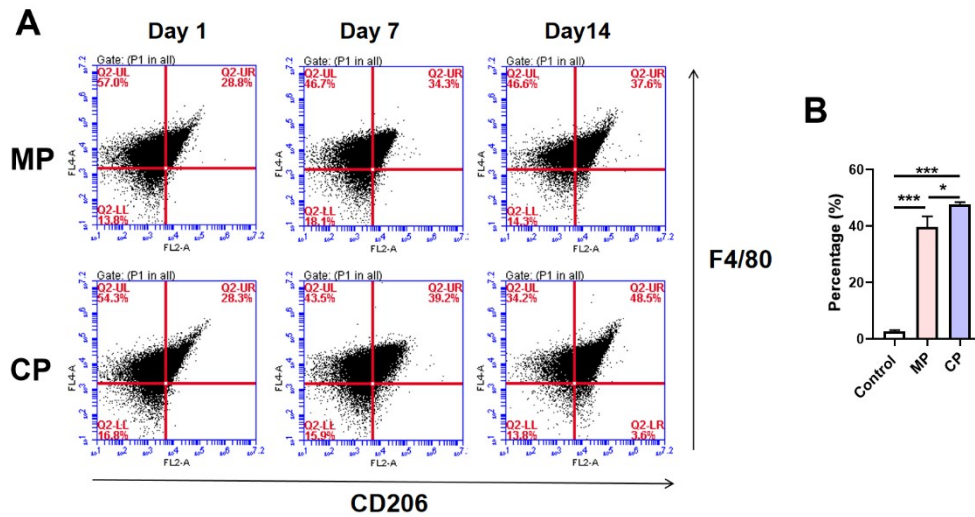

Figure S7. The flow scatter plot (A) and quantitative analysis (B) of membrane preparations (MP) and cell preparations (CP) on macrophage phenotype. \* $P < 0.05$ ; \*\*\* $P < 0.001$  vs Control group. (n = 3 independent experiments)
